# Supplementary material for: A secreted antibacterial neuropeptide shapes the microbiome of Hydra
Source: PubMed Central journal article supplement (PMC5614986; doi:10.1038/s41467-017-00625-1), 2017-09-26
Supplement: 41467_2017_625_MOESM1_ESM.pdf [file 41467_2017_625_MOESM1_ESM.pdf]

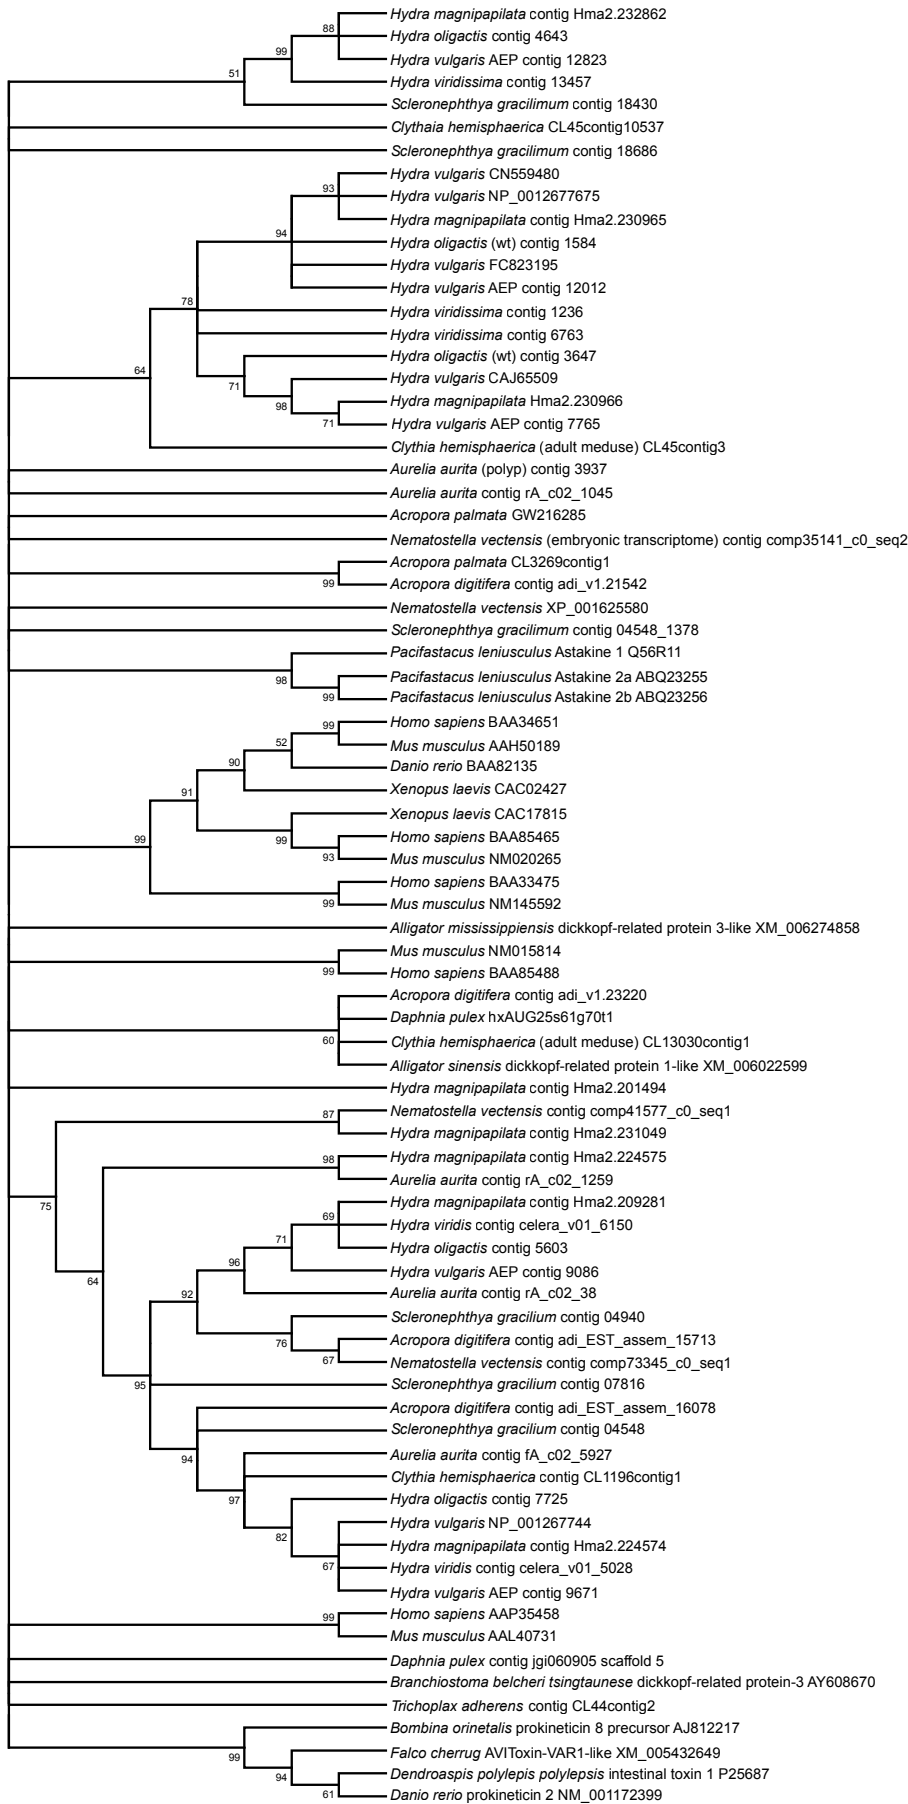

NDA-1

Hydra Dickkopf-1/2/4

Astakines

Dickkopf-1

Dickkopf-2

Dickkopf-4

Dickkopf-3

Hydra Dickkopf-3 and related

Colipases

Prokineticins

**Supplementary Figure 1.** Neighbour-joining phylogenetic tree of prokineticins, astakines, Dickkopf and colipase gene families showing absence of congruence between NDA-1 (at the top) and the other peptides.

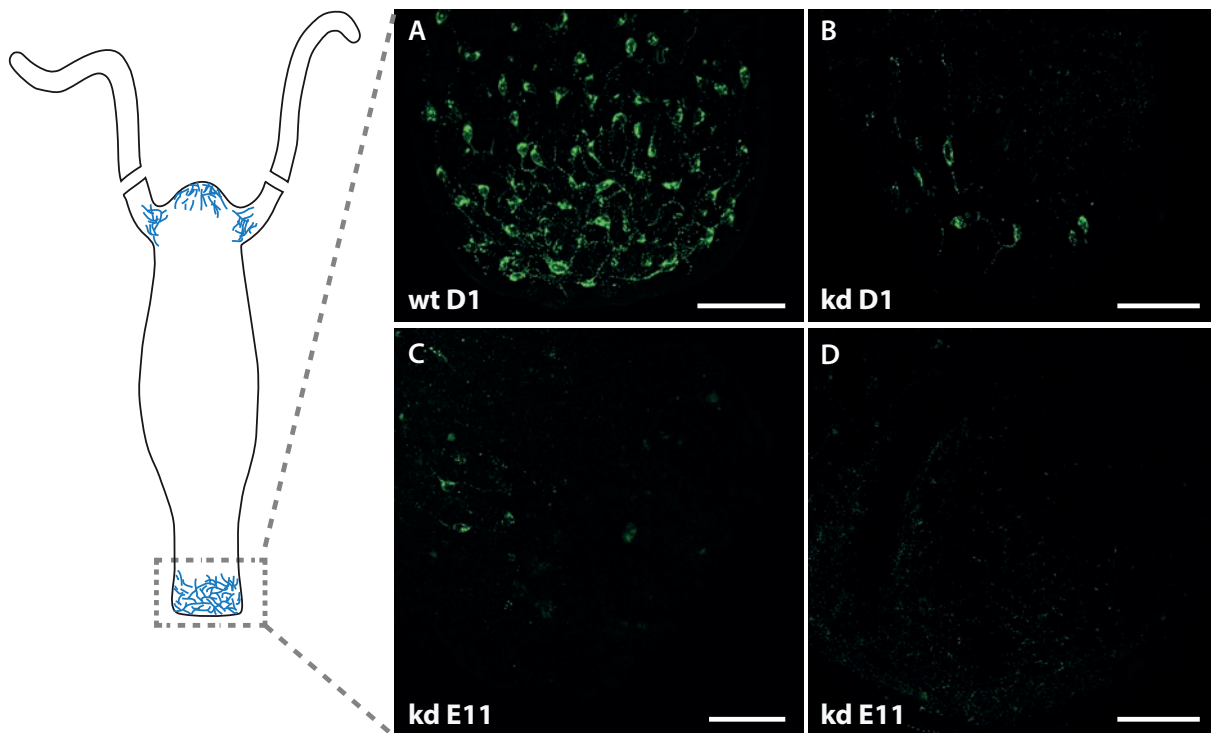

**Supplementary Figure 2.** Confocal laser scanning micrographs of the foot region of Hydra, stained for NDA-1 peptide by means of polyclonal antiserum. Wildtype (panel A) is compared to the transgenic knockdown lines D1 (B) and E11 (C, D), which have lower NDA-1 expression levels. Scale bars: 50  $\mu$ m.

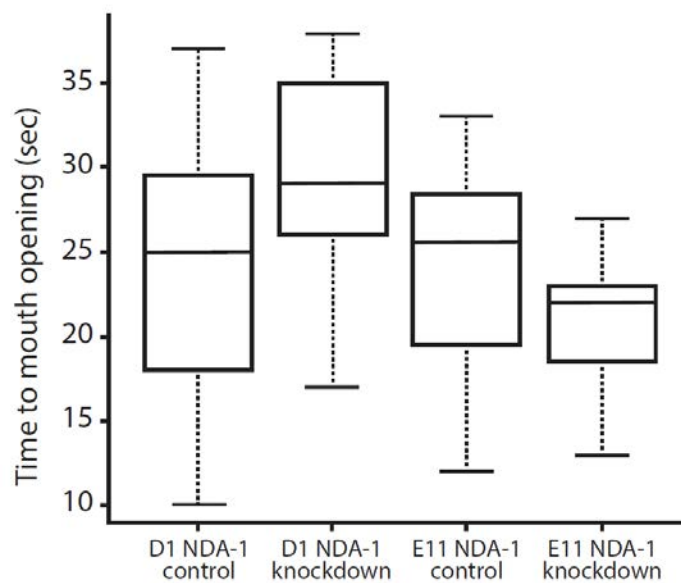

**Supplementary Figure 3. Glutathione (GSH) response of NDA-1 knockdown and control polyps.** The feeding response of *Hydra* can be evoked chemically using micromolar concentrations of  $\gamma$ -glutamyl-cysteinyl-glycine (reduced glutathione, GSH), which forces the polyps to open their mouth as they do when capturing prey<sup>1</sup>. This GSH-induced response, like feeding behaviour, is neuron-dependent, since nerve-free animals do not open their mouth<sup>2</sup>. The figure shows the GSH response in 100% of NDA-1 knockdown animals after exposure to 10 $\mu$ M GSH. There was no statistical significant difference in time to mouth opening between NDA-1 knockdown and control animals (t-test: D1:  $t = -2$ ,  $df = 20$ ,  $p = 0.1$ ; NDA-1 control  $n = 12$ , NDA-1 knockdown  $n = 13$ ; E11:  $t = 1$ ,  $df = 20$ ,  $p = 0.2$ ; NDA-1 control  $n = 12$ , NDA-1 knockdown  $n = 12$ ). Boxes in boxplots represent the interquartile range, the line inside the box corresponds to the median, and the whiskers display the span of the data (maximum and minimum values)

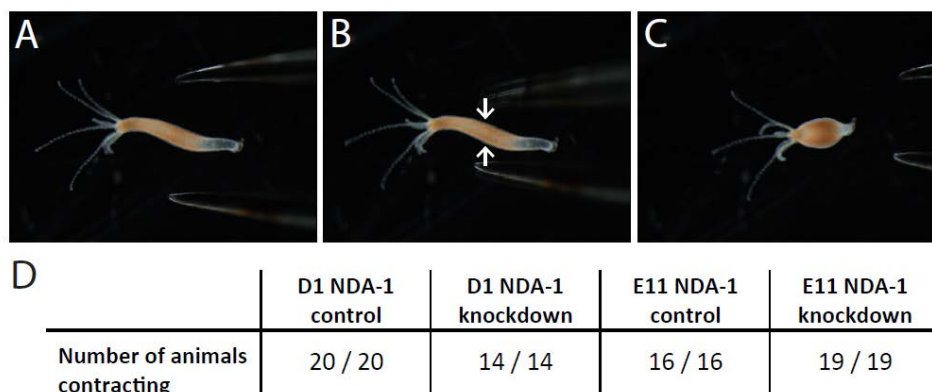

**Supplementary Figure 4. Contractile behavior induced by mechanical stimulation.**

When *Hydra* polyps are pinched with a pair of forceps, the animals response with rapid contraction of the body column<sup>2</sup>. Here this response to mechanical stimulation is shown. Panel A: no stimulation. Panel B: pincer stimulation as indicated by arrows. Panel C: contraction of body column. Panel D: Response of control and NDA-1 knockdown animals. There was no difference in contractile behaviour.

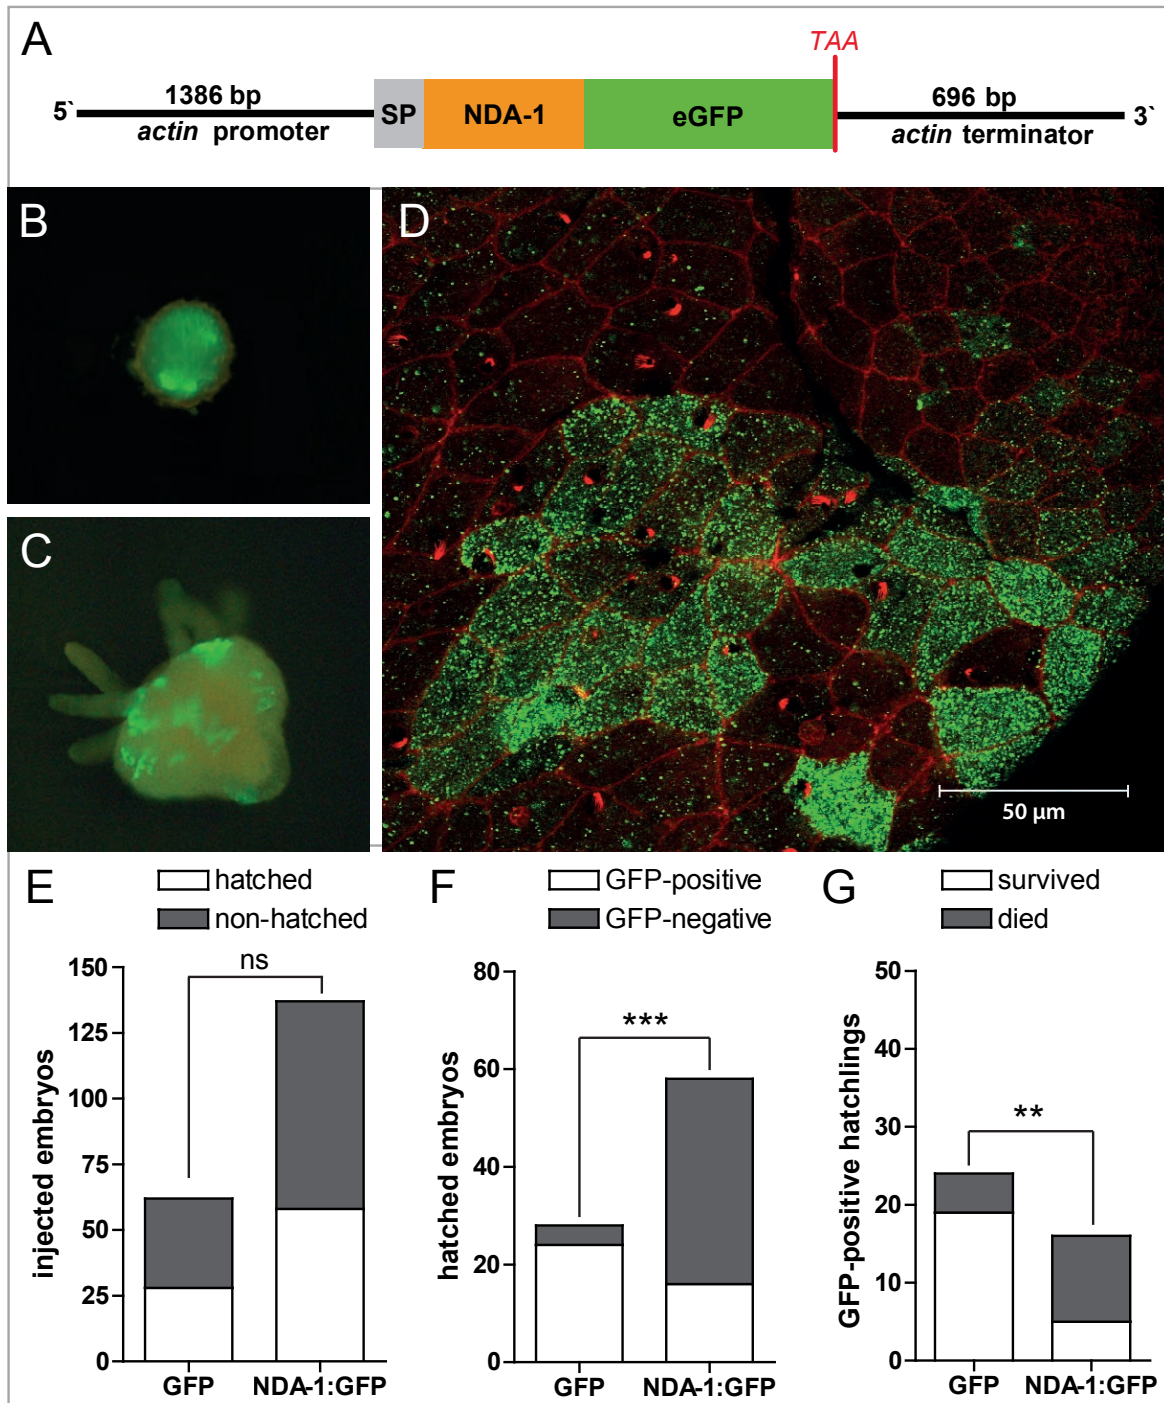

### Supplementary Figure 5. Ectopic overexpression of NDA-1:eGFP.

(A) Construct used for generation of transgenic hydra overexpressing NDA-1:eGFP. (B, C) *In vivo* images of a transgenic *Hydra vulgaris* (AEP) embryo (B) and hatchling (C) with mosaic expression of NDA-1:eGFP. (D) Immunostaining detects the NDA-1:eGFP fusion protein in dense vesicles of ectodermal epithelial cells. Green, eGFP; red, rhodamin-phalloidin for F-actin. (E) Embryos injected with the NDA-1:eGFP construct showed no difference in hatching rate compared to embryos injected with a control construct based on the same vector lacking the NDA-1 sequence (eGFP: n=62; NDA-1:eGFP: n=137; p=0.7583, Fisher's exact test). (F) NDA-1:eGFP injection resulted in significantly less GFP-positive hatchlings compared to the control construct (eGFP: n=28; NDA-1:eGFP: n=58; p<0.0001, Fisher's exact test). (G) Hatchlings expressing NDA-1:eGFP showed significantly reduced survival compared to hatchlings expressing eGFP only (eGFP: n=24; NDA-1:eGFP: n=16; p=0.0036, Fisher's exact test). Notably, all surviving NDA-1:eGFP hatchlings lost their GFP-positive cells within 2-3 weeks after hatching and thus, no stable transgenic line was obtained.

**Supplementary Table 1.** Statistical analysis of the minimum model for tissue and treatment as explanatory variables

| <b>Figure 3A. Abundance of <i>Curvibacter</i> sp. at various body parts</b> |             |          |         |        |          |          |                |
|-----------------------------------------------------------------------------|-------------|----------|---------|--------|----------|----------|----------------|
| <b>Side-by-side comparison of tissues</b>                                   |             |          |         |        |          |          |                |
| Body part                                                                   | versus      | Estimate | Std.    | Error  | t-value  | Pr(> t ) | p adjusted fdr |
| TENTACLE                                                                    | (Intercept) | 1.9979   | 0.1070  | 18.67  | 4.01e-14 | ***      | 5.944444e-12   |
|                                                                             | FOOT        | -2.6821  | 0.1514  | -17.72 | 1.07e-13 | ***      | 5.944444e-12   |
|                                                                             | HEAD        | -1.7384  | 0.1514  | -11.48 | 2.94e-10 | ***      | 2.041667e-09   |
|                                                                             | BODY DOWN   | -2.0300  | 0.1514  | -13.41 | 1.86e-11 | ***      | 3.100000e-10   |
|                                                                             | BODY UP     | -1.9630  | 0.1514  | -12.97 | 3.41e-11 | ***      | 4.059524e-10   |
| HEAD                                                                        | (Intercept) | 0.2595   | 0.1070  | 2.425  | 0.0249   | *        | 4.882353e-02   |
|                                                                             | BODY DOWN   | -0.2916  | 0.1514  | -1.926 | 0.0684   |          | 1.058824e-01   |
|                                                                             | BODY UP     | -0.2246  | 0.1514  | -1.484 | 0.1534   |          | 2.029101e-01   |
|                                                                             | FOOT        | -0.9436  | 0.1514  | -6.234 | 4.35e-06 | ***      | 1.647727e-05   |
|                                                                             | TENTACLE    | 1.7384   | 0.1514  | 11.485 | 2.94e-10 | ***      | 2.041667e-09   |
| BODY UP                                                                     | (Intercept) | 0.03491  | 0.10703 | 0.326  | 0.747666 |          | 7.675310e-01   |
|                                                                             | BODY DOWN   | -0.06698 | 0.15136 | -0.443 | 0.662845 |          | 7.532330e-01   |
|                                                                             | FOOT        | -0.71903 | 0.15136 | -4.750 | 0.000122 | ***      | 2.346154e-04   |
|                                                                             | HEAD        | 0.22460  | 0.15136 | 1.484  | 0.153430 |          | 1.917875e-01   |
|                                                                             | TENTACLE    | 1.96303  | 0.15136 | 12.969 | 3.41e-11 | ***      | 2.131250e-10   |
| BODY DOWN                                                                   | (Intercept) | -0.03207 | 0.10703 | -0.300 | 0.767531 |          | 7.675310e-01   |
|                                                                             | BODY UP     | 0.06698  | 0.15136 | 0.443  | 0.662845 |          | 7.584039e-01   |
|                                                                             | FOOT        | -0.65204 | 0.15136 | -4.308 | 0.000343 | ***      | 7.656250e-04   |
|                                                                             | HEAD        | 0.29159  | 0.15136 | 1.926  | 0.068383 |          | 1.058824e-01   |
|                                                                             | TENTACLE    | 2.03001  | 0.15136 | 13.412 | 1.86e-11 | ***      | 3.100000e-10   |
| FOOT                                                                        | (Intercept) | -0.6841  | 0.1070  | -6.392 | 3.09e-06 | ***      | 1.647727e-05   |
|                                                                             | HEAD        | 0.9436   | 0.1514  | 6.234  | 4.35e-06 | ***      | 1.647727e-05   |
|                                                                             | BODY DOWN   | 0.6520   | 0.1514  | 4.308  | 0.000343 | ***      | 7.656250e-04   |
|                                                                             | BODY UP     | 0.7190   | 0.1514  | 4.750  | 0.000122 | ***      | 3.630952e-04   |
|                                                                             | TENTACLE    | 2.6821   | 0.1514  | 17.719 | 1.07e-13 | ***      | 5.944444e-12   |

  

| <b>Figure 3D. NDA-1 expression in hydra knockdown lines D1 and E11</b> |                        |          |                                                  |             |             |             |               |
|------------------------------------------------------------------------|------------------------|----------|--------------------------------------------------|-------------|-------------|-------------|---------------|
| General output of the statistical model                                |                        |          | Side-by-side comparison control versus knockdown |             |             |             |               |
|                                                                        | F-statistics $F_{1,8}$ | p        | diff                                             | lwr         | upr         | p_adjusted  |               |
| Treatment                                                              | 93.006                 | 1.11e-05 | D1 (kd-wt)                                       | -0.8172679  | -14,154,722 | -0.2190636  | 0.0101530 *   |
| Line                                                                   | 6.757                  | 0.03164  | E11 (kd-wt)                                      | -17,304,441 | -23,286,483 | -11,322,398 | 0.0000696 *** |
| Line x Treatment                                                       | 11.949                 | 0.00861  |                                                  |             |             |             |               |

  

| <b>Figure 3E. Body site distribution of <i>Curvibacter</i> sp. in NDA-1 knockdown lines and controls</b> |                     |     |          |                                                  |              |          |        |       |          |            |
|----------------------------------------------------------------------------------------------------------|---------------------|-----|----------|--------------------------------------------------|--------------|----------|--------|-------|----------|------------|
| General output of the statistical model                                                                  |                     |     |          | Side-by-side comparison control versus knockdown |              |          |        |       |          |            |
|                                                                                                          | $\chi^2$ statistics | ddl | Deviance | P-value                                          | Side-by-side | Estimate | Std.E. | t     | value    | p adj. fdr |
| Tissue                                                                                                   | 45                  |     | 9.1787   | 7.507e-09                                        | Head kd-wt   | 0.3144   | 0.1354 | 2.312 | 0.025080 | 0.0430     |
| Treatment                                                                                                | 43                  |     | 1.1432   | 0.02432                                          | Foot kd-wt   | 0.3144   | 0.1354 | 2.312 | 0.0251   | 0.0430     |

**Supplementary References:**

- <sup>1</sup> Lenhoff, H. M. (1961). Activation of the Feeding Reflex in *Hydra littoralis*: I. Role played by reduced glutathione, and quantitative assay of the feeding reflex. *J. Gen. Physiol.* **45**, 331–344.
- <sup>2</sup> Campbell, R. D., Josephson, R. K., Schwab, W. E. & Rushforth, N. B. *Excitability of nerve-free hydra.* *Nature* **262**, 388–390 (1976).
